# Supplementary material
Source: publisher figshare collection journal article supplement (https://acs.figshare.com/ndownloader/files/4608592)
Supplement: Supplementary file 1 [file 4608592]

## Supplementary Information

### Aligned bundles of carbon nanotubes are easily grown on as-synthesised mesoporous silicate substrates

Stephanie Morgan and Robert Mokaya\*

*School of Chemistry, University of Nottingham, University Park, Nottingham NG7 2RD, U. K.*

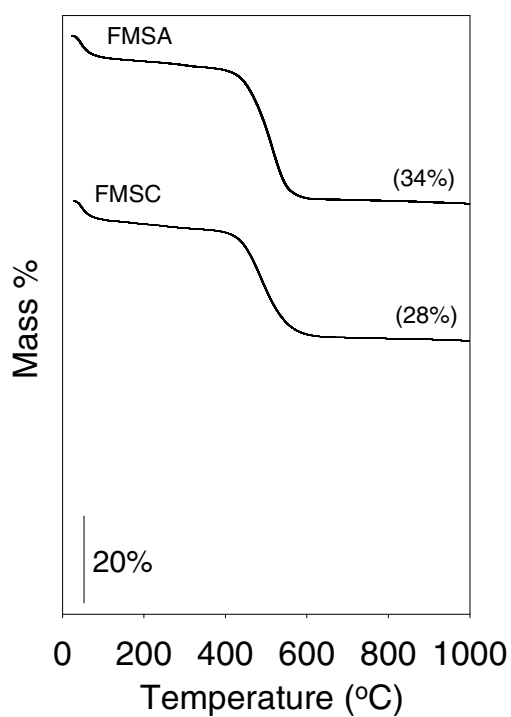

**Supplementary Figure 1.** TGA curves for carbon/silica composites prepared from Fe-impregnated silica substrates. The numbers in parenthesis indicate the carbon content as wt% of the composite.

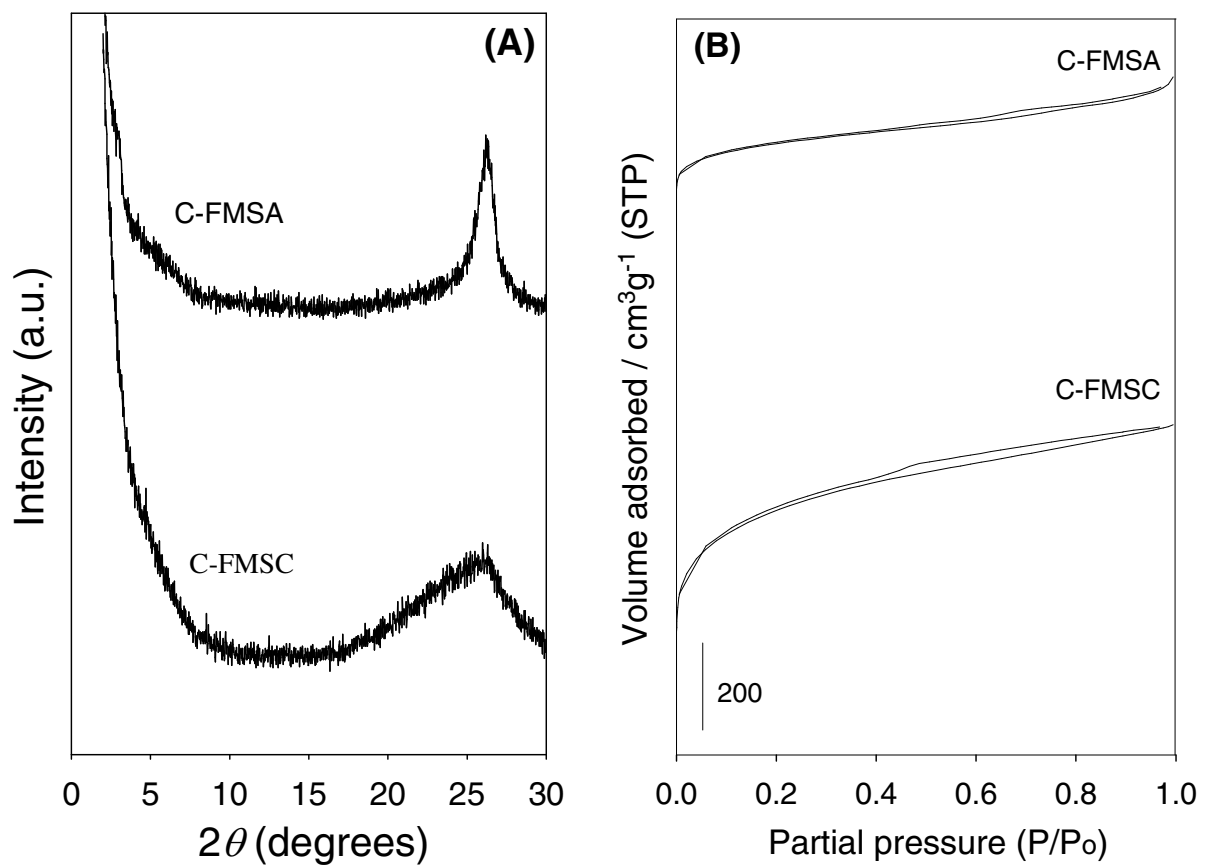

**Supplementary Figure 2.** Powder XRD patterns (A) and nitrogen sorption isotherms (B) of carbons derived from Fe-impregnated silica substrates.

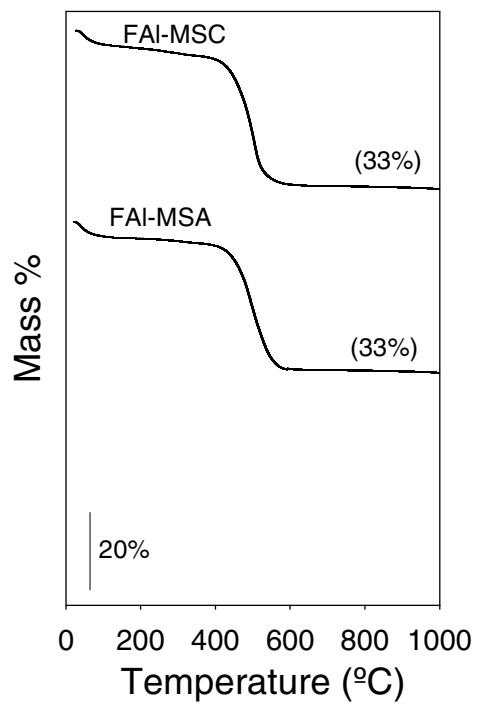

**Supplementary Figure 3.** TGA curves for carbon/Fe-aluminosilica composites prepared from Fe-impregnated aluminosilica substrates. The numbers in parenthesis indicate the carbon content as wt% of the composite.

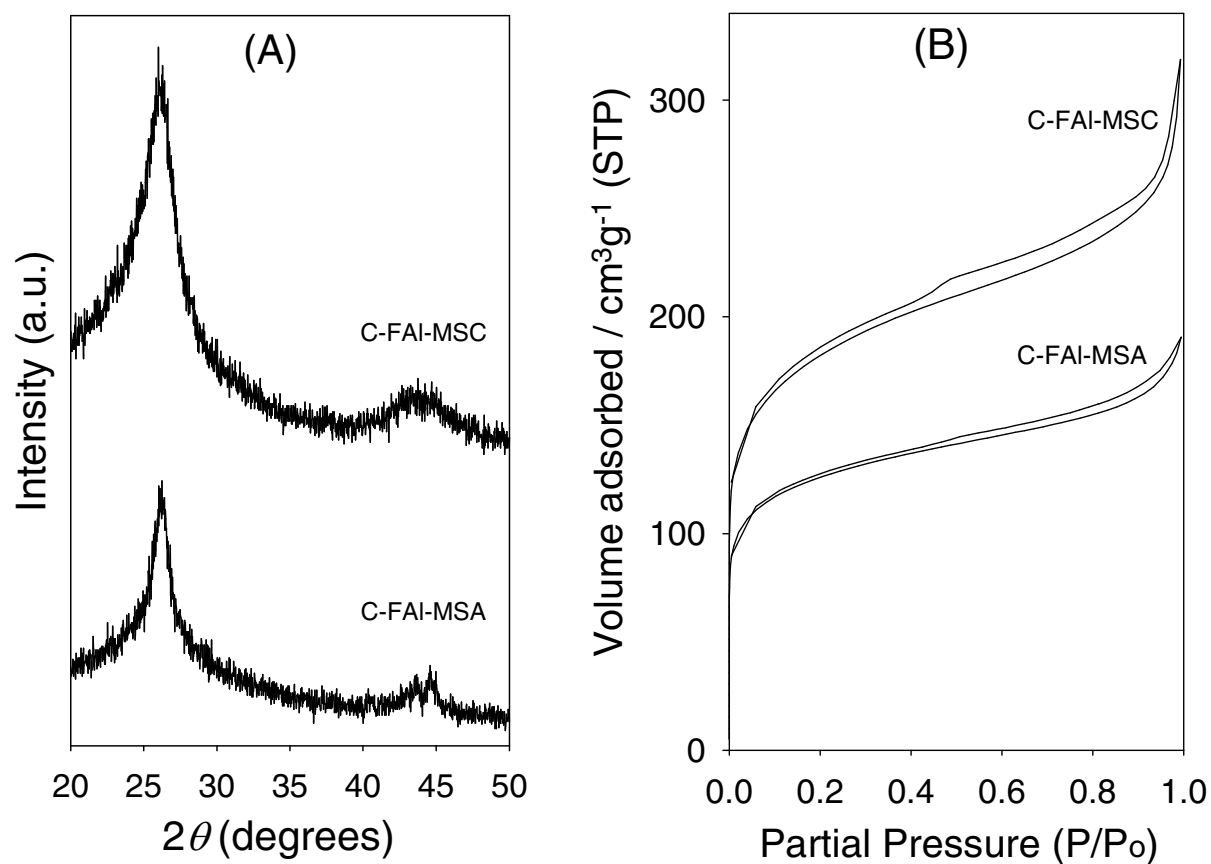

**Supplementary Figure 4.** Powder XRD patterns (A) and nitrogen sorption isotherms (B) of carbon material prepared from Fe impregnated aluminosilicate substrates.
